# Supplementary material for: Hyaluronic Acid-Functionalized Bismuth Sulfide Nanoparticles as Targeted CT Contrast Agents
Source: Research Square preprint supplement (doi:10.21203/rs.3.rs-7955778/v1), 2025-11-26
Supplement: Supplementary file 1 [file 0b9305ce9b70414067315e6a.pdf]

## Supporting Information

### Hyaluronic Acid-Functionalized Bismuth Sulfide Nanoparticles as Targeted CT Contrast Agents

Farahnaz Seyedabutorabi<sup>1</sup>, Mohammad Hosntalab<sup>1</sup>, Samad Muhammadnejad<sup>2</sup>, Farshid

Babapour Mofrad<sup>1</sup> & Hamid Delavari<sup>3\*</sup>

\*Corresponding author: Hamid Delavari (email: [hamid.delavari@gmail.com](mailto:hamid.delavari@gmail.com))

**Table S1.** Hydrodynamic diameters, polydispersity index (PDI) and intercept of  $\text{Bi}_2\text{S}_3@\text{BSA}$  and  $\text{Bi}_2\text{S}_3@\text{BSA-HA}$  NPs obtained from dynamic light scattering (DLS) at 25 °C (water;  $\eta = 0.8872$  cP).

| Sample                                | Distribution type | Size (d, nm) | PDI | Intercept |
|---------------------------------------|-------------------|--------------|-----|-----------|
| $\text{Bi}_2\text{S}_3@\text{BSA}$    | Intensity         | 178          | 0.2 | 0.9       |
|                                       | Volume            | 141          | 0.2 | 0.9       |
|                                       | Number            | 69.8         | 0.2 | 0.9       |
| $\text{Bi}_2\text{S}_3@\text{BSA-HA}$ | Intensity         | 75.3         | 0.2 | 0.9       |
|                                       | Volume            | 13.0         | 0.2 | 0.9       |
|                                       | Number            | 12.4         | 0.2 | 0.9       |

- **Intensity (%):** relative contribution of particle size populations to total scattered light intensity in DLS analysis.
- **PDI:** Polydispersity index; PDI < 0.2 nearly monodisperse, 0.2–0.4 moderate,  $\geq 0.4$  broad distribution.
- **Intercept:** initial amplitude of correlation function  $g_2(\tau)$ ; values **0.9–1.0** indicate excellent signal quality.
- **Measurement details:** Malvern Zetasizer, DTS v4.20; clear disposable zeta cell.

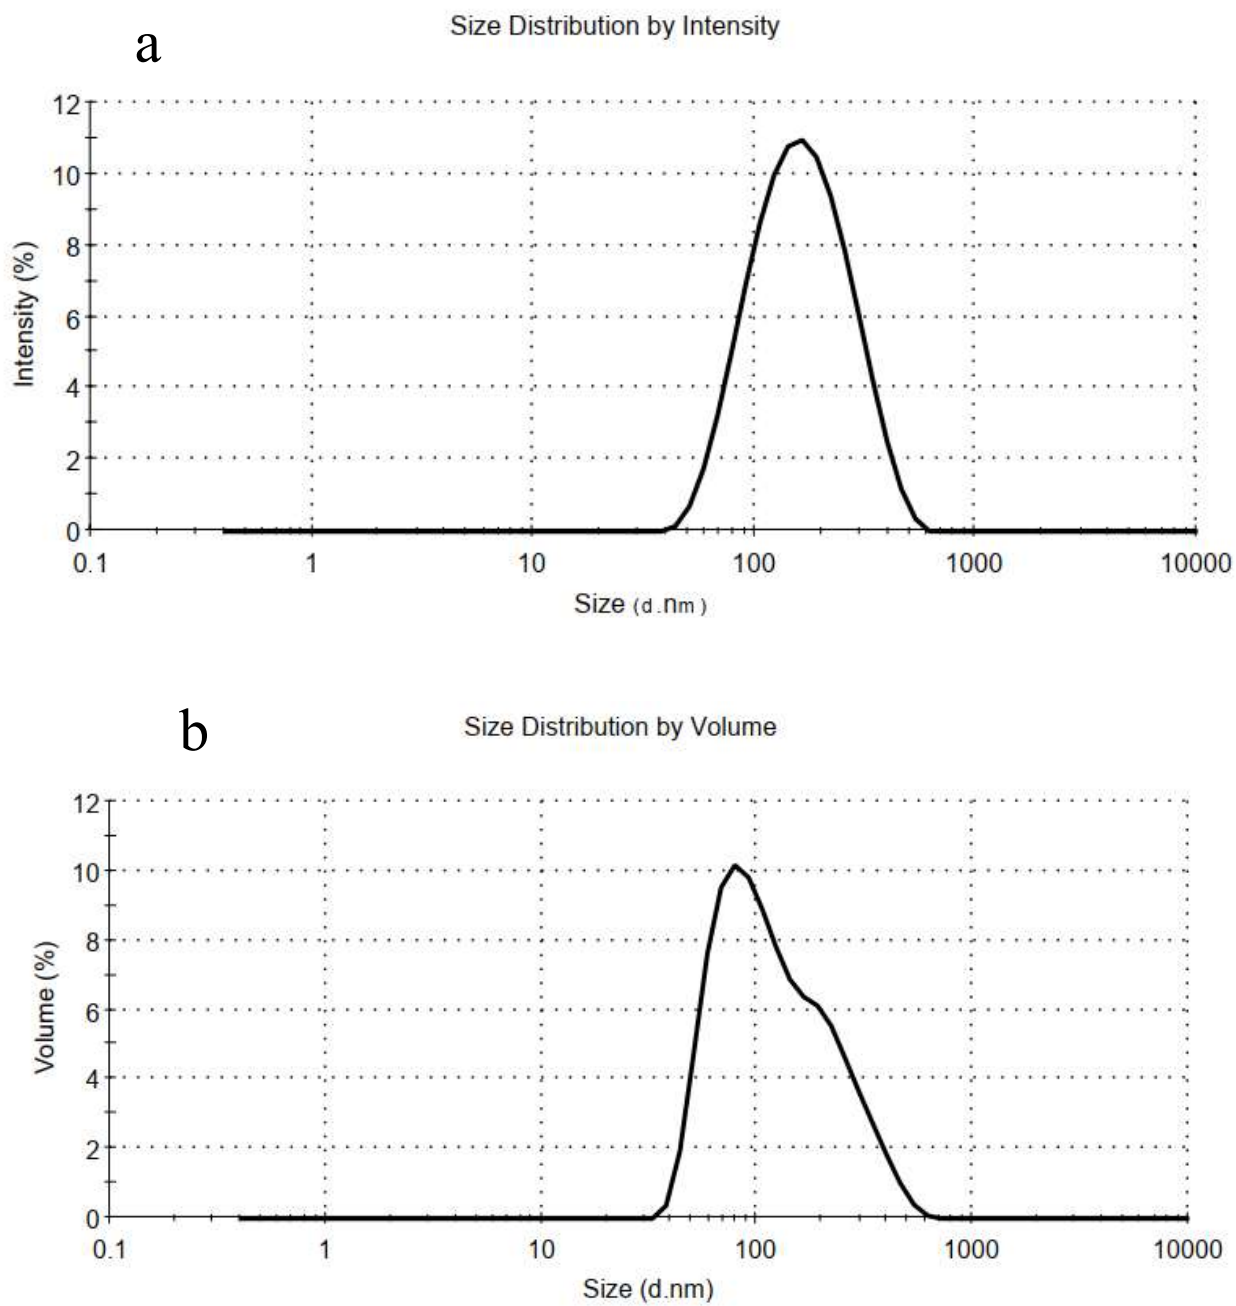

**Figure S1.** Dynamic light scattering (DLS) size distributions of  $\text{Bi}_2\text{S}_3\text{@BSA}$  NPs obtained using (a) intensity- and (b) volume-weighted analysis. Measurements were performed in distilled water at 25 °C. The number-weighted distribution is presented in Fig. 1c of the main text

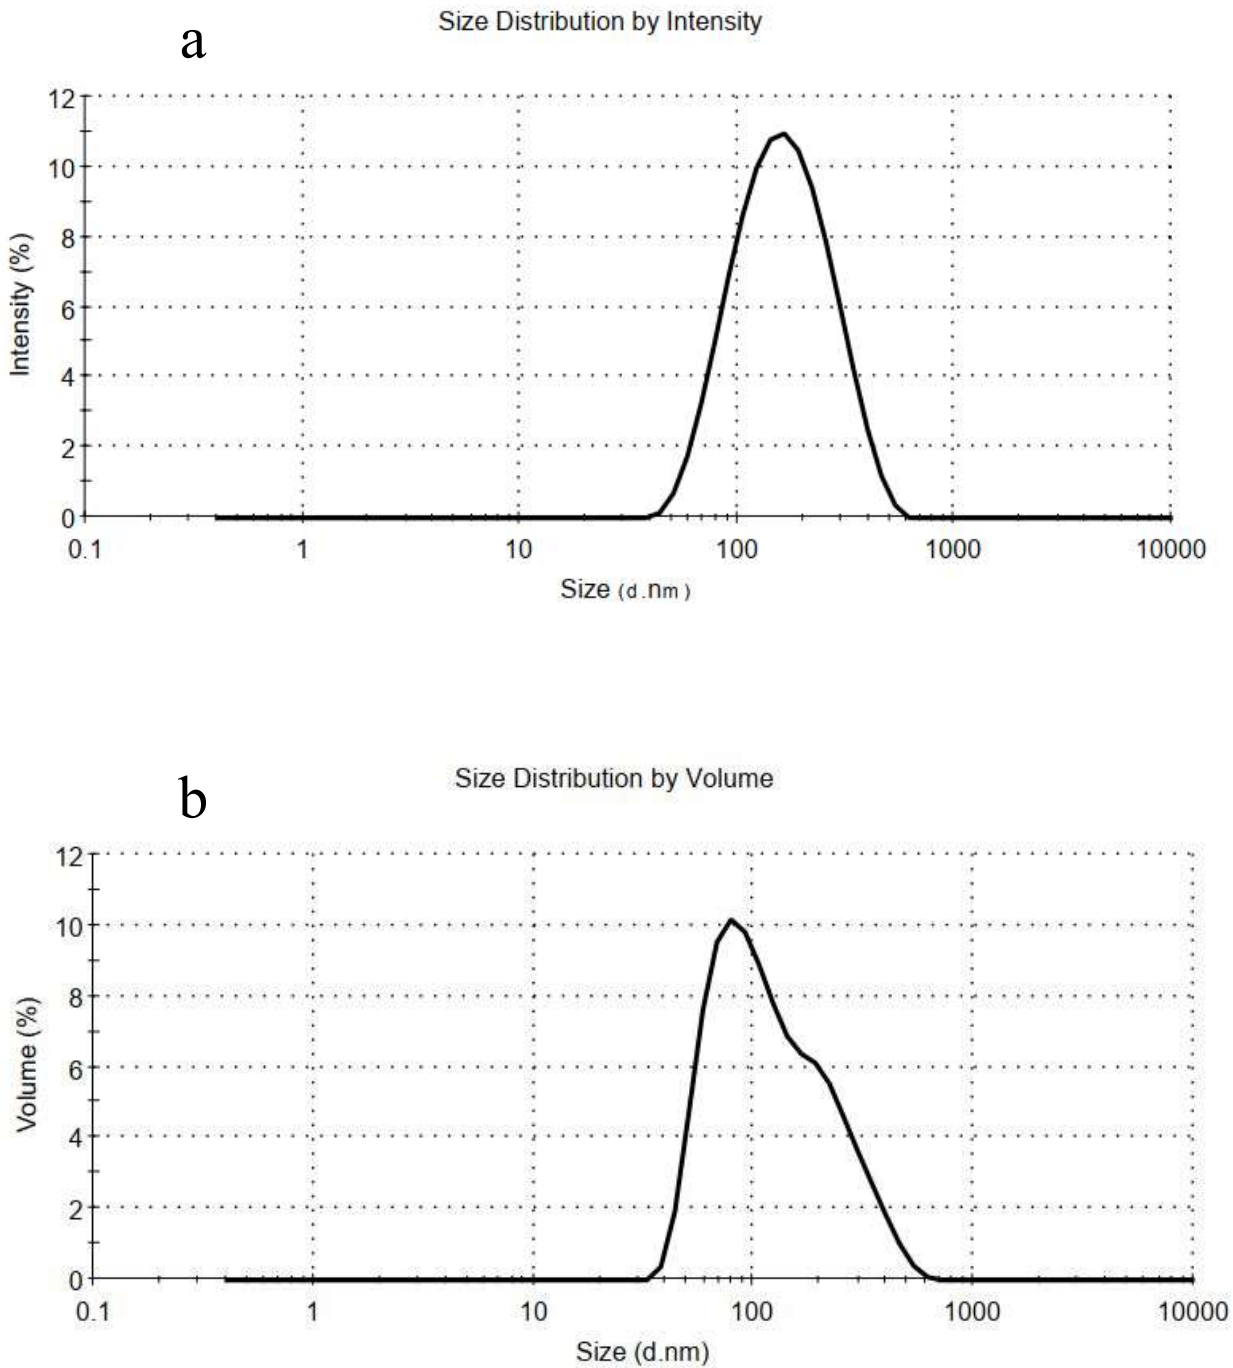

**Figure S2.** DLS size distributions of Bi<sub>2</sub>S<sub>3</sub>@BSA-HA NPs obtained using (a) intensity- and (b) volume-weighted analysis. Measurements were performed in distilled water at 25 °C. The number-weighted distribution is presented in Fig. 1d of the main text.

**Table S2.** Zeta potential parameters of  $\text{Bi}_2\text{S}_3@\text{BSA}$  and  $\text{Bi}_2\text{S}_3@\text{BSA-HA}$  NPs measured by electrophoretic light scattering (Smoluchowski model) at 25 °C.

| Sample                                | Zeta potential (mV) | Peak (mV) | Width (mV) | Conductivity ( $\text{mS cm}^{-1}$ ) | Count rate (kcps) |
|---------------------------------------|---------------------|-----------|------------|--------------------------------------|-------------------|
| $\text{Bi}_2\text{S}_3@\text{BSA}$    | $-19.4 \pm 4.0$     | -15.6     | 22         | 8.20                                 | 2891              |
| $\text{Bi}_2\text{S}_3@\text{BSA-HA}$ | $-35.5 \pm 6.1$     | -35.5     | 16.3       | 1.32                                 | 5806              |

- **Peak (mV):** Most frequent (mode) value in the zeta potential distribution.
- **Width (mV):** Distribution width (half-height range) representing sample polydispersity in surface charge.
- **Conductivity ( $\text{mS cm}^{-1}$ ):** Electrical conductivity of the dispersant medium influencing electrophoretic mobility-to-zeta potential conversion.
- **Count rate (kcps):** Photon count rate indicating the quality and stability of the light scattering signal during measurement.
- **Model:** Conversion model used by the instrument (Smoluchowski for aqueous dispersions)

**Table S3.** Linear regression equations and coefficients of determination ( $R^2$ ) describing the relationship between CT number (HU) and Bi concentration ( $\text{mg Bi mL}^{-1}$ ) for  $\text{Bi}_2\text{S}_3@\text{BSA-HA}$ ,  $\text{Bi}_2\text{S}_3@\text{BSA}$ , and Omnipaque at tube voltages of 80, 110, and 130 kVp.

| Voltage (kVp) | CT Number (HU)                        |                                     |                                     |
|---------------|---------------------------------------|-------------------------------------|-------------------------------------|
|               | $\text{Bi}_2\text{S}_3@\text{BSA-HA}$ | $\text{Bi}_2\text{S}_3@\text{BSA}$  | Omnipaque                           |
| <b>80</b>     | Y = 91.92*X + 6.169<br>$R^2 = 0.98$   | Y = 64.67*X + 6.865<br>$R^2 = 0.97$ | Y = 44.33*X - 1.665<br>$R^2 = 0.92$ |
| <b>110</b>    | Y = 77.55*X + 2.881<br>$R^2 = 0.98$   | Y = 52.45*X + 7.565<br>$R^2 = 0.95$ | Y = 31.80*X + 1.034<br>$R^2 = 0.93$ |
| <b>130</b>    | Y = 73.65*X + 2.578<br>$R^2 = 0.98$   | Y = 50.20*X + 6.394<br>$R^2 = 0.95$ | Y = 30.57*X - 6.825<br>$R^2 = 0.91$ |

**Table S4.** Linear regression equations and coefficients of determination ( $R^2$ ) describing the relationship between contrast-to-noise ratio (CNR) and Bi concentration (mg Bi mL<sup>-1</sup>) for Bi<sub>2</sub>S<sub>3</sub>@BSA–HA, Bi<sub>2</sub>S<sub>3</sub>@BSA, and Omnipaque at tube voltages of 80, 110, and 130 kVp.

| Voltage<br>(kVp) | CNR                                    |                                     |                                       |
|------------------|----------------------------------------|-------------------------------------|---------------------------------------|
|                  | Bi <sub>2</sub> S <sub>3</sub> @BSA–HA | Bi <sub>2</sub> S <sub>3</sub> @BSA | Omnipaque                             |
| <b>80</b>        | Y = 13.93*X + 0.9345<br>$R^2 = 0.98$   | Y = 9.861*X + 1.174<br>$R^2 = 0.98$ | Y = 6.819*X - 0.03411<br>$R^2 = 0.93$ |
| <b>110</b>       | Y = 12.33*X + 1.147<br>$R^2 = 0.95$    | Y = 8.126*X + 1.527<br>$R^2 = 0.96$ | Y = 4.900*X + 0.3320<br>$R^2 = 0.93$  |
| <b>130</b>       | Y = 11.39*X + 0.8837<br>$R^2 = 0.98$   | Y = 7.748*X + 1.270<br>$R^2 = 0.96$ | Y = 4.651*X - 0.5746<br>$R^2 = 0.92$  |
